# Supplementary material for: A series of three-dimensional (3D) chiral lanthanide coordination polymers generated by spontaneous resolution
Source: Royal Society of Chemistry journal article supplement (doi:10.1039/c2ce26028j), 2012-01-01
Supplement: c2ce26028j.pdf [file c2ce26028j.pdf]

## Supporting Information

### **A series of three-dimensional (3D) chiral lanthanide coordination polymers generated by spontaneous resolution**

Li-Min Zhang, Da-Yi Deng, Guo Peng, Lin Sun, Li Liang, Guo-Qiang Lan,  
Hong Deng\*

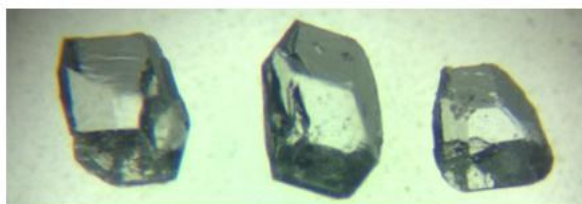

(a)

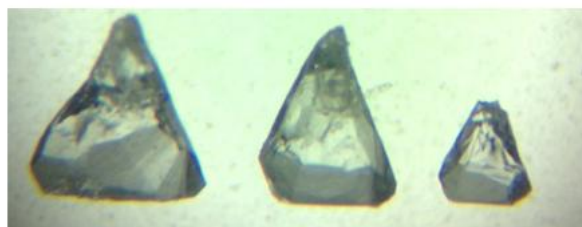

(b)

**Fig. S1** Morphologies of the single crystals of **4a** (a) and **4b** (b).

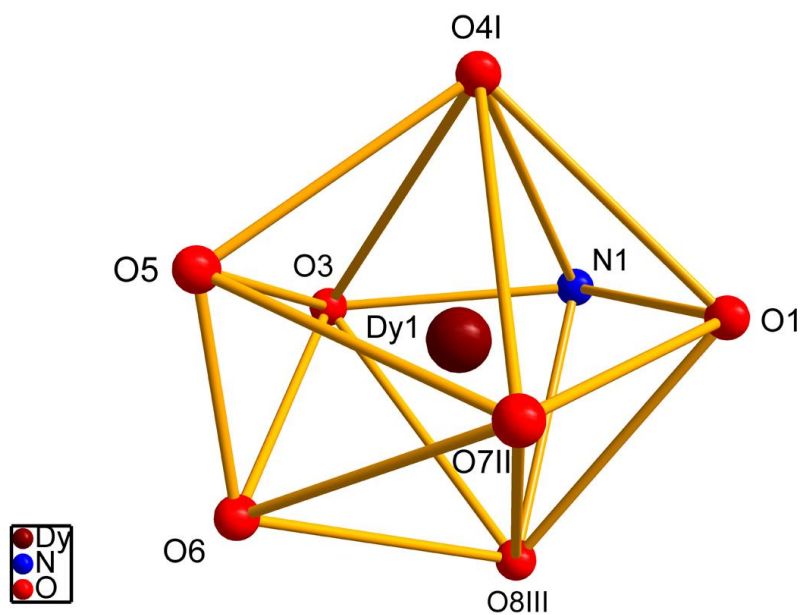

**Fig. S2** The eight-coordinated dodecahedron geometry of Dy(III) center. Symmetry codes: I (0.5+x, 0.5-y, 2-z); II (1-x, 0.5+y, 1.5-z); III (1+x, y, z).

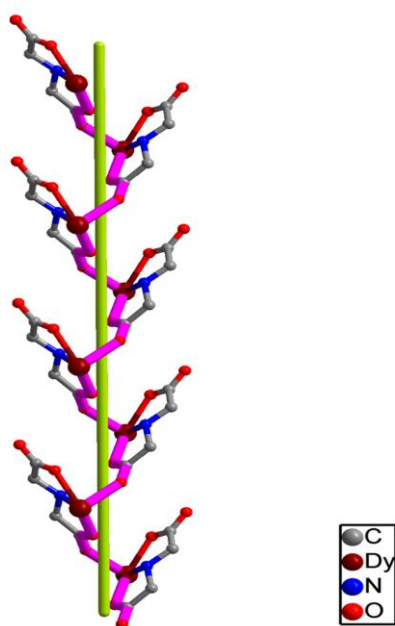

**Fig. S3** The right-handed helix running parallel to *a*-axis in **4b**.

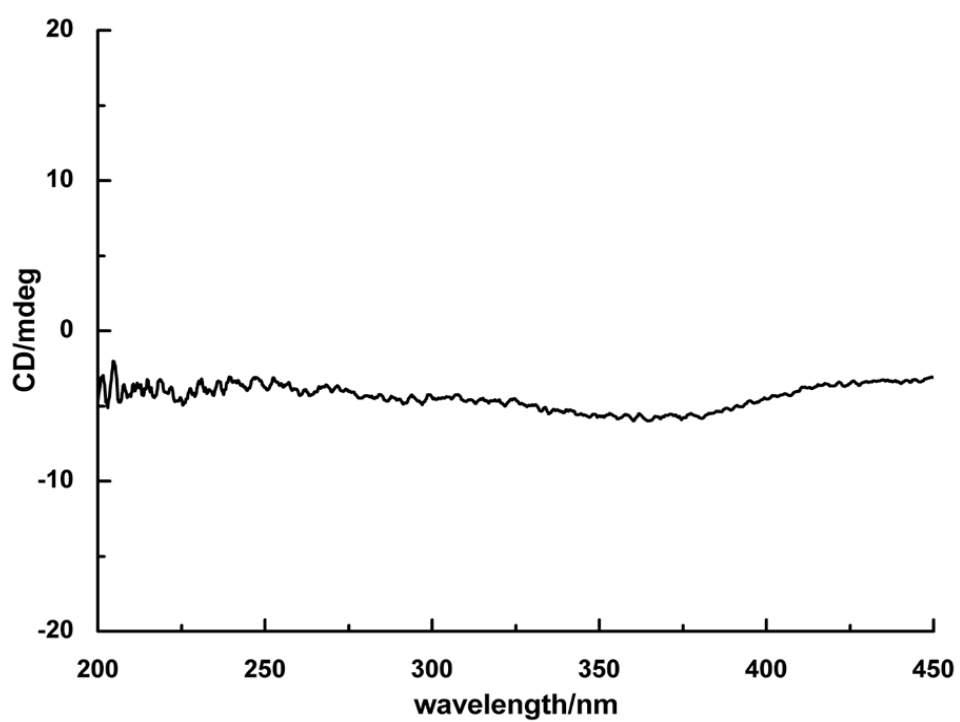

**Fig. S4** The CD spectra of bulk sample of **4**.

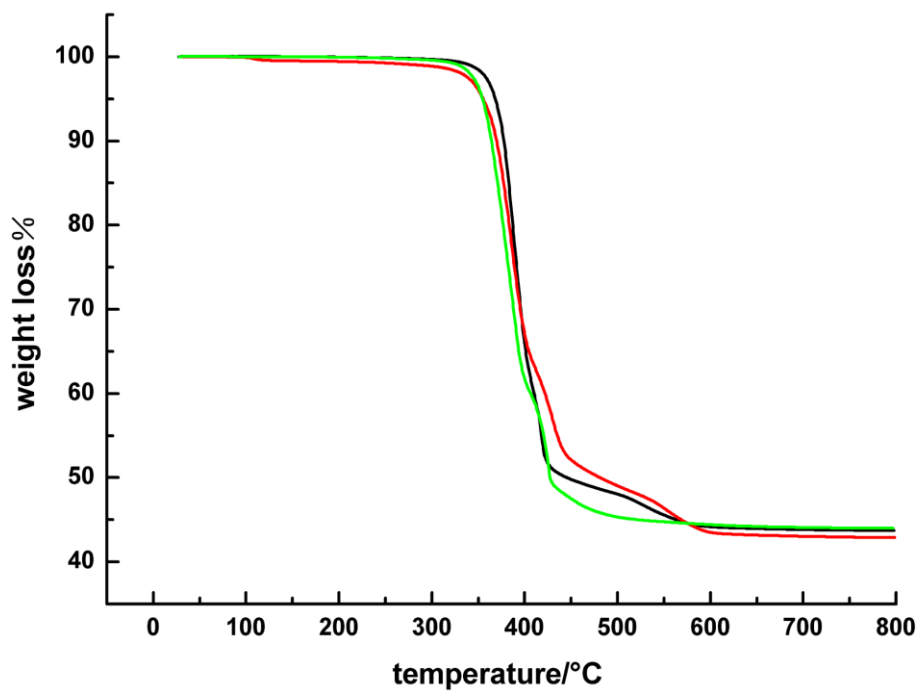

**Fig. S5** The TG curve of **2** (red), **3** (green), **4** (black).

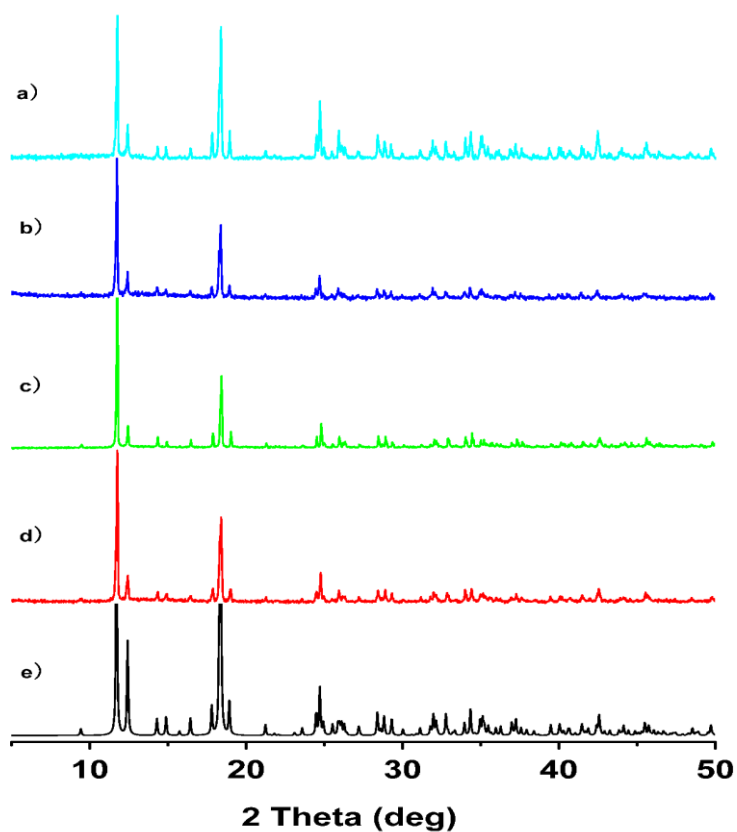

**Fig. S6** PXRD patterns (a) for as-synthesized **1**, (b) for as-synthesized **2**, (c) for as-synthesized **3**, (d) for as-synthesized **4**, (e) stimulated based on the X-ray single-crystal diffraction data of **4**.

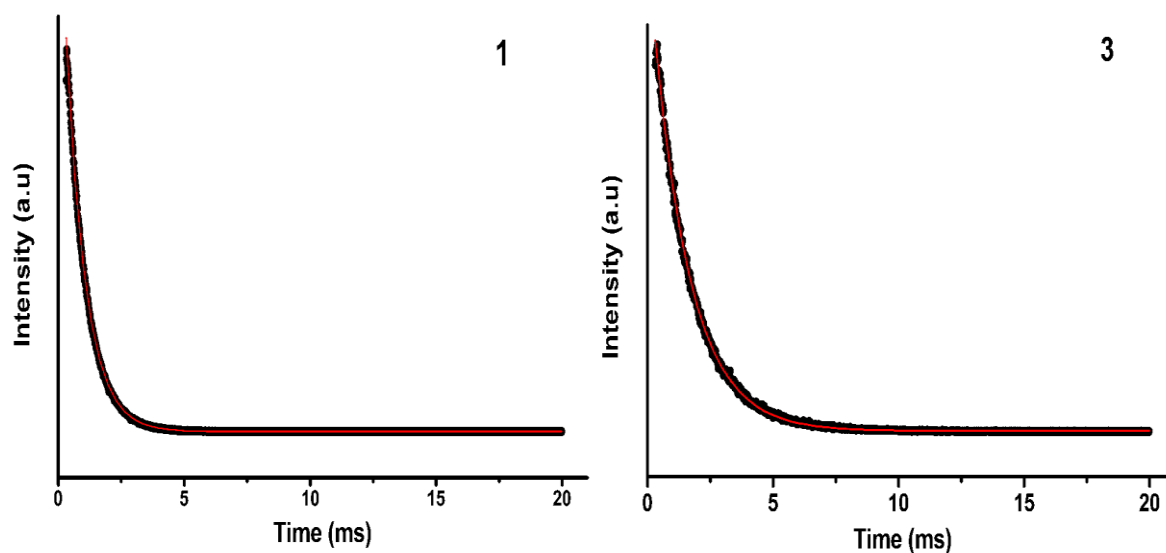

**Fig. S7** View of the luminescent decay curves for compounds **1** and **3**. The red lines represent the fitting curves and the black lines are the raw

experimental curves.

**Table S1** Selected Bond angles ( $^{\circ}$ ) for complexes **1-4**. Symmetry transformations used to generate equivalent atoms are given as footnotes.

| Compound 1 <sup>[a]</sup> |            |                   |            |
|---------------------------|------------|-------------------|------------|
| O(8)#2-Eu(1)-O(4)#3       | 160.44(16) | O(8)#2-Eu(1)-O(3) | 89.74(16)  |
| O(4)#3-Eu(1)-O(3)         | 94.05(18)  | O(8)#2-Eu(1)-O(7) | 93.39(16)  |
| O(4)#3-Eu(1)-O(7)         | 91.29(18)  | O(3)-Eu(1)-O(5)   | 80.62(17)  |
| O(3)-Eu(1)-O(7)           | 154.86(16) | O(7)-Eu(1)-O(5)   | 77.11(18)  |
| O(8)#2-Eu(1)-O(1)         | 82.79(17)  | O(1)-Eu(1)-O(5)   | 141.85(18) |
| O(4)#3-Eu(1)-O(1)         | 80.08(17)  | O(8)#2-Eu(1)-O(6) | 72.68(15)  |
| O(3)-Eu(1)-O(1)           | 129.94(15) | O(4)#3-Eu(1)-O(6) | 126.87(16) |
| O(7)-Eu(1)-O(1)           | 75.19(15)  | O(3)-Eu(1)-O(6)   | 79.92(15)  |
| O(7)-Eu(1)-O(6)           | 77.25(16)  | O(5)-Eu(1)-O(6)   | 52.05(15)  |
| O(8)#2-Eu(1)-N(1)         | 78.22(17)  | O(1)-Eu(1)-O(6)   | 141.60(14) |
| O(4)#3-Eu(1)-N(1)         | 86.03(16)  | O(3)-Eu(1)-N(1)   | 64.91(15)  |
| O(7)-Eu(1)-N(1)           | 140.07(17) | O(1)-Eu(1)-N(1)   | 65.10(15)  |
| O(5)-Eu(1)-N(1)           | 139.20(16) | O(6)-Eu(1)-N(1)   | 133.98(16) |
| O(8)#2-Eu(1)-O(5)         | 124.72(15) | O(4)#3-Eu(1)-O(5) | 74.84(15)  |
| Compound 2 <sup>[b]</sup> |            |                   |            |
| O(7)#1-Gd(1)-O(2)#2       | 160.37(10) | O(3)-Gd(1)-O(5)   | 140.84(12) |

---

|                     |            |                   |            |
|---------------------|------------|-------------------|------------|
| O(7)#1-Gd(1)-O(1)   | 90.29(10)  | O(1)-Gd(1)-O(6)   | 79.85(10)  |
| O(2)#2-Gd(1)-O(1)   | 93.34(11)  | O(8)#3-Gd(1)-O(6) | 76.76(10)  |
| O(7)#1-Gd(1)-O(8)#3 | 92.98(11)  | O(3)-Gd(1)-O(6)   | 141.50(10) |
| O(2)#2-Gd(1)-O(8)#3 | 92.08(12)  | O(5)-Gd(1)-O(6)   | 52.37(10)  |
| O(1)-Gd(1)-O(8)#3   | 154.28(11) | O(7)#1-Gd(1)-N(1) | 78.31(11)  |
| O(7)#1-Gd(1)-O(3)   | 82.84(11)  | O(2)#2-Gd(1)-N(1) | 85.74(11)  |
| O(2)#2-Gd(1)-O(3)   | 80.18(11)  | O(1)-Gd(1)-N(1)   | 65.13(10)  |
| O(1)-Gd(1)-O(3)     | 130.67(10) | O(8)#3-Gd(1)-N(1) | 140.43(11) |
| O(8)#3-Gd(1)-O(3)   | 75.04(10)  | O(3)-Gd(1)-N(1)   | 65.64(10)  |
| O(7)#1-Gd(1)-O(5)   | 125.34(10) | O(5)-Gd(1)-N(1)   | 139.15(10) |
| O(2)#2-Gd(1)-O(5)   | 74.28(10)  | O(6)-Gd(1)-N(1)   | 134.12(11) |
| O(1)-Gd(1)-O(5)     | 80.60(11)  | O(7)#1-Gd(1)-O(6) | 72.98(10)  |
| O(8)#3-Gd(1)-O(5)   | 76.72(11)  | O(2)#2-Gd(1)-O(6) | 126.65(10) |

Compound 3 <sup>[c]</sup>

|                     |            |                   |            |
|---------------------|------------|-------------------|------------|
| O(8)#2-Tb(1)-O(4)#3 | 160.00(16) | O(1)-Tb(1)-O(6)   | 141.58(16) |
| O(8)#2-Tb(1)-O(7)#4 | 92.81(18)  | O(8)#2-Tb(1)-N(1) | 78.28(18)  |
| O(4)#3-Tb(1)-O(3)   | 93.23(19)  | O(4)#3-Tb(1)-N(1) | 85.28(18)  |
| O(7)#4-Tb(1)-O(3)   | 153.61(18) | O(7)#4-Tb(1)-N(1) | 140.53(19) |
| O(8)#2-Tb(1)-O(1)   | 82.69(17)  | O(3)-Tb(1)-N(1)   | 65.66(17)  |
| O(4)#3-Tb(1)-O(1)   | 80.19(17)  | O(3)-Tb(1)-O(6)   | 79.22(17)  |
| O(7)#4-Tb(1)-O(1)   | 75.08(17)  | O(5)-Tb(1)-N(1)   | 138.72(17) |
| O(3)-Tb(1)-O(1)     | 131.29(16) | O(6)-Tb(1)-N(1)   | 134.17(18) |
| O(8)#2-Tb(1)-O(5)   | 125.98(17) | O(1)-Tb(1)-N(1)   | 65.71(16)  |
| O(4)#3-Tb(1)-O(5)   | 74.01(17)  | O(7)#4-Tb(1)-O(6) | 76.64(18)  |
| O(3)-Tb(1)-O(5)     | 80.03(17)  | O(8)#2-Tb(1)-O(6) | 73.25(16)  |
| O(1)-Tb(1)-O(5)     | 140.63(19) | O(5)-Tb(1)-O(6)   | 52.74(17)  |
| O(4)#3-Tb(1)-O(7)#4 | 92.71(19)  | O(8)#2-Tb(1)-O(3) | 90.31(17)  |
| O(7)#4-Tb(1)-O(5)   | 76.96(19)  | O(4)#3-Tb(1)-O(6) | 126.75(17) |

Compound 4a <sup>[d]</sup>

|                     |            |                   |            |
|---------------------|------------|-------------------|------------|
| O(7)#1-Dy(1)-O(4)#2 | 159.83(12) | O(6)-Dy(1)-N(1)   | 134.08(12) |
| O(7)#1-Dy(1)-O(3)   | 90.14(13)  | O(1)-Dy(1)-N(1)   | 65.90(12)  |
| O(4)#2-Dy(1)-O(3)   | 93.42(14)  | O(8)#3-Dy(1)-N(1) | 140.84(13) |
| O(7)#1-Dy(1)-O(8)#3 | 92.98(13)  | O(3)-Dy(1)-N(1)   | 65.85(12)  |
| O(4)#2-Dy(1)-O(8)#3 | 92.78(13)  | O(4)#2-Dy(1)-N(1) | 85.30(13)  |
| O(3)-Dy(1)-O(8)#3   | 153.08(13) | O(7)#1-Dy(1)-N(1) | 78.06(13)  |
| O(7)#1-Dy(1)-O(1)   | 82.90(12)  | O(6)-Dy(1)-O(5)   | 52.77(12)  |
| O(4)#2-Dy(1)-O(1)   | 79.91(12)  | O(1)-Dy(1)-O(5)   | 140.22(13) |
| O(3)-Dy(1)-O(1)     | 131.66(12) | O(8)#3-Dy(1)-O(5) | 76.61(13)  |
| O(8)#3-Dy(1)-O(1)   | 75.24(12)  | O(3)-Dy(1)-O(5)   | 80.00(13)  |
| O(7)#1-Dy(1)-O(6)   | 73.44(11)  | O(4)#2-Dy(1)-O(5) | 73.96(12)  |
| O(4)#2-Dy(1)-O(6)   | 126.73(12) | O(7)#1-Dy(1)-O(5) | 126.20(12) |
| O(3)-Dy(1)-O(6)     | 78.86(12)  | O(1)-Dy(1)-O(6)   | 141.76(12) |
| O(8)#3-Dy(1)-O(6)   | 76.45(12)  | O(5)-Dy(1)-N(1)   | 138.77(13) |

Compound 4b <sup>[e]</sup>

---

---

|                     |          |                     |          |
|---------------------|----------|---------------------|----------|
| O(7)#1-Dy(1)-O(4)#2 | 160.1(3) | O(7)#1-Dy(1)-O(8)#3 | 92.6(3)  |
| O(4)#2-Dy(1)-O(8)#3 | 92.7(3)  | O(7)#1-Dy(1)-O(3)   | 90.5(3)  |
| O(4)#2-Dy(1)-O(3)   | 93.4(3)  | O(8)#3-Dy(1)-O(3)   | 153.3(3) |
| O(7)#1-Dy(1)-O(1)   | 82.8(3)  | O(4)#2-Dy(1)-O(1)   | 80.1(3)  |
| O(8)#3-Dy(1)-O(1)   | 74.7(3)  | O(3)-Dy(1)-O(1)     | 131.9(2) |
| O(7)#1-Dy(1)-O(5)   | 126.0(3) | O(4)#2-Dy(1)-O(5)   | 73.9(3)  |
| O(8)#3-Dy(1)-O(5)   | 76.6(3)  | O(3)-Dy(1)-O(5)     | 80.2(3)  |
| O(1)-Dy(1)-O(5)     | 139.9(3) | O(7)#1-Dy(1)-O(6)   | 73.1(2)  |
| O(4)#2-Dy(1)-O(6)   | 126.8(3) | O(8)#3-Dy(1)-O(6)   | 76.4(3)  |
| O(3)-Dy(1)-O(6)     | 79.2(3)  | O(1)-Dy(1)-O(6)     | 141.2(2) |
| O(5)-Dy(1)-O(6)     | 52.9(3)  | O(7)#1-Dy(1)-N(1)   | 78.4(3)  |
| O(4)#2-Dy(1)-N(1)   | 85.3(3)  | O(8)#3-Dy(1)-N(1)   | 140.6(3) |
| O(3)-Dy(1)-N(1)     | 65.8(2)  | O(1)-Dy(1)-N(1)     | 66.1(2)  |
| O(5)-Dy(1)-N(1)     | 138.9(3) | O(6)-Dy(1)-N(1)     | 134.3(3) |

---

[a] #1:  $-x+1, y+1/2, -z+3/2$ ; #2:  $x+1/2, -y+1/2, -z+2$ ; #3:  $x+1, y, z$ ; #4:  $x-1/2, -y+1/2, -z+2$ ; #5:  $x-1, y, z$ ; #6:  $-x+1, y-1/2, -z+3/2$ ; [b] #1:  $-x+1, y+1/2, -z+1/2$ ; #2:  $x-1/2, -y+3/2, -z$ ; #3:  $x-1, y, z$ ; #4:  $x+1/2, -y+3/2, -z$ ; #5:  $-x+1, y-1/2, -z+1/2$ ; #6:  $x+1, y, z$ ; [c] #1:  $x-1/2, -y+1/2, -z$ ; #2:  $-x, y-1/2, -z+1/2$ ; #3:  $x+1/2, -y+1/2, -z$ ; #4:  $x+1, y, z$ ; #5:  $-x, y+1/2, -z+1/2$ ; #6:  $x-1, y, z$ ; [d] #1:  $-x+1, y+1/2, -z+3/2$ ; #2:  $x+1/2, -y+1/2, -z+2$ ; #3:  $x+1, y, z$ ; #4:  $x-1/2, -y+1/2, -z+2$ ; #5:  $-x+1, y-1/2, -z+3/2$ ; #6:  $x-1, y, z$ ; [e] #1:  $-x+1, y-1/2, -z+1/2$ ; #2:  $x-1/2, -y+3/2, -z$ ; #3:  $x-1, y, z$ ; #4:  $x+1/2, -y+3/2, -z$ ; #5:  $x+1, y, z$ ; #6:  $-x+1, y+1/2, -z+1/2$ .
